## RESEARCH ARTICLE

# Mortality and associated risk factors in patients hospitalized due to COVID-19 in a Peruvian reference hospital

Alonso Soto<sup>1,2\*</sup>, Dante M. Quiñones-Laveriano<sup>1</sup>, Johan Azañero<sup>2,3</sup>, Rafael Chumpitaz<sup>2</sup>, José Claros<sup>2</sup>, Lucía Salazar<sup>2</sup>, Oscar Rosales<sup>2</sup>, Liz Nuñez<sup>4</sup>, David Roca<sup>4</sup>, Andres Alcantara<sup>2</sup>

**1** Instituto de Investigaciones en Ciencias Biomédicas (INICIB), Faculty of Medicine, Universidad Ricardo Palma, Lima, Peru, **2** Department of Internal Medicine, Hospital Nacional Hipólito Unanue, Lima, Peru, **3** Universidad Científica del Sur, Lima, Peru, **4** Faculty of Medicine, Universidad Ricardo Palma, Lima, Peru

\* [alonso.soto@urp.edu.pe](mailto:alonso.soto@urp.edu.pe)

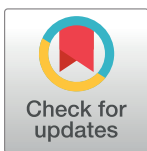

## Abstract

### Objectives

To determine the risk factors for in-hospital mortality in patients with COVID-19 from a Peruvian national hospital.

### Methods

Retrospective cohort study of medical records of patients with COVID-19 hospitalized at Hospital Nacional Hipólito Unanue (HNHU) during the months of April to August 2020. The dependent variable was in-hospital mortality. Independent variables included sociodemographic and clinical characteristics, physical examination findings, oxygen saturation (SaO<sub>2</sub>) at admission, treatment received during hospitalization and laboratory results at admission. A Cox regression model was used to evaluate the crude and adjusted hazard ratios for associated factors.

### Results

We included 1418 patients. Median age was 58 years (IQR 47–68 years) and 944 (66.6%) were male. The median length of hospitalization was 7 (4–13) days, and the mortality rate was 46%. The most frequent comorbidities were type 2 diabetes mellitus, hypertension, and obesity. In the adjusted analysis, mortality was associated with age (HR 1.02; 95%CI 1.02–1.03), history of surgery (HR 1.89; 95%CI 1.31–2.74), lower oxygen saturation at admission (HR 4.08; CI95% 2.72–8.05 for SaO<sub>2</sub><70% compared to SaO<sub>2</sub>>94%), the presence of poor general condition (HR 1.81; 95% CI 1.29–2.53), altered state of consciousness (HR 1.58; 95%CI 1.18–2.11) and leukocyte levels (HR 1.01; 95%CI 1.00–1.02). Treatment with ivermectin (HR 1.44; 95%CI 1.18–1.76) and azithromycin (HR 1.25; 95%CI 1.03–1.52) were associated with higher mortality. Treatment with corticosteroids at low to moderate doses was associated with lower mortality (HR 0.56 95%CI 0.37–0.86) in comparison to no steroid use.

## OPEN ACCESS

**Citation:** Soto A, Quiñones-Laveriano DM, Azañero J, Chumpitaz R, Claros J, Salazar L, et al. (2022) Mortality and associated risk factors in patients hospitalized due to COVID-19 in a Peruvian reference hospital. *PLoS ONE* 17(3): e0264789. <https://doi.org/10.1371/journal.pone.0264789>

**Editor:** Raffaele Serra, University Magna Graecia of Catanzaro, ITALY

**Received:** October 20, 2021

**Accepted:** February 16, 2022

**Published:** March 2, 2022

**Peer Review History:** PLOS recognizes the benefits of transparency in the peer review process; therefore, we enable the publication of all of the content of peer review and author responses alongside final, published articles. The editorial history of this article is available here: <https://doi.org/10.1371/journal.pone.0264789>

**Copyright:** © 2022 Soto et al. This is an open access article distributed under the terms of the [Creative Commons Attribution License](https://creativecommons.org/licenses/by/4.0/), which permits unrestricted use, distribution, and reproduction in any medium, provided the original author and source are credited.

**Data Availability Statement:** All relevant data are within the paper and its [Supporting Information](#) files.

**Funding:** The author(s) received no specific funding for this work.

**Competing interests:** The authors have declared that no competing interests exist.

## Conclusion

A high mortality was found in our cohort. Low oxygen saturation at admission, age, and the presence of hematological and biochemical alterations were associated with higher mortality. The use of hydroxychloroquine, ivermectin or azithromycin was not useful and was probably associated with unfavorable outcomes. The use of corticosteroids at moderate doses was associated with lower mortality.

## Introduction

COVID-19 pandemic is one of the most important sanitary catastrophes of our recent history and have had devastating consequences in health systems as well as quality of life of millions of people worldwide, especially in low and middle income countries [1], not only due to disease itself but also on its negative impact on healthcare workforce [2]. Until the end of December 2021, there were more than 278 million of cases and almost 5.45 million of deaths worldwide [3]. Peru, with more than 200,000 deaths due to COVID-19, is one of the countries with highest mortality [3, 4].

While most COVID-19 patients experience mild flu-like illness, a significant proportion develop pneumonia that can evolve into acute respiratory distress syndrome (ARDS), which requires hospitalization in critical care units [5, 6]. Within the group of hospitalized patients, mortality can be close to 50% [7], which can be even higher in older patients, those with comorbidities or with a lower oxygen saturation (SaO<sub>2</sub>) at admission [5, 6]. Among laboratory markers, C-reactive protein (CRP), procalcitonin, lactate dehydrogenase (LDH) and platelets, among others, could predict a serious clinical deterioration in these patients [8–10]. However, predictors of mortality are heterogeneous among different countries. In addition, the association of several repurposed treatments for COVID with in-hospital outcomes needs to be addressed, particularly the most widespread drugs used during the first year of the pandemic, namely ivermectin, azithromycin and hydroxychloroquine

Knowledge of hospital epidemiology considering the different characteristics of population and health facilities is crucial for preparedness against COVID-19 pandemic. A better understanding of risk factors for mortality can facilitate the triage and management of patients and optimize the use of the limited resources available on public hospitals.

The objective of the study was to determine risk factors for in-hospital mortality in patients with COVID-19 from a Peruvian national hospital.

## Material and methods

### Study design and setting

The study was a retrospective cohort based on the review of clinical records of patients hospitalized due to COVID-19 hospitalized from April to August 2020 in Hospital Nacional Hipólito Unanue (HNHU), a reference hospital in Lima, Peru. HNHU coverage includes mainly uninsured population of poor socioeconomical background and is one of the hospitals that serves the largest number of COVID-19 patients and depends on Peruvian Ministry of Health (MINSA).

### Population

The population was composed of patients hospitalized in dedicated wards for care of patients with COVID-19. The diagnosis of COVID-19 was based on serological, molecular and/or

clinical radiological picture. Data from all patients hospitalized during the study period were taken, consisting of 1884 medical records. Statistical power was calculated to detect a HR considered clinically relevant of at least 1.5 with 95% confidence, resulting in a power greater than 99.9%. We included all records from hospitalized adult patients with diagnosis of COVID-19. We excluded patients with incomplete data regarding outcomes, and those who died or were discharged before 24 hours of admission.

### Data collection and variables

We retrospectively reviewed data from medical records using an *ad hoc* data collection form using anonymized data and then translated to a database in Microsoft excel. The dependent variable was in-hospital mortality. Independent variables included sociodemographic factors, clinical characteristics, comorbidities, vital functions at admission, oxygen saturation at admission, treatment received during hospitalization and laboratory data obtained at admission. Collection of data was coordinated with the archive of Hospital after authorization from Department of medicine and ethical clearance.

### Statistical analysis

Categorical variables were presented using frequencies and percentages, while numerical variables through measures of central tendency and dispersion. An initial bivariate analysis was performed using t-test for numerical variables and chi-squared for categorical ones. To evaluate the association of independent variable with mortality, Cox regression was performed to find the crude and adjusted hazard ratios (HR), with their respective 95% confidence intervals of those variables found significant in the bivariate analysis. The multivariate Cox regression model included those variables found significant in bivariate analysis except those variables considered as possibly collinear and those variables with less than 80% available values. All the analysis were performed using STATA v15 for windows.

### Ethical aspects

The study was limited to the retrospective review of medical records. Collection of data were anonymized before entered in the database file. This study was conducted according to the tenets of the Declaration of Helsinki and was approved by the Department of Medicine of HNHU and by the Institutional Ethics Committees of HNHU (letter 116-2021-CIEI-HNHU) and Universidad Ricardo Palma (PG-25-2020).

### Results

Out of 1884 patients hospitalized in the study period, 1418 fulfill inclusion and exclusion criteria and were included in the final analysis (Fig 1).

The diagnosis was mainly serological (70.8%), followed by clinical radiological (21.5%) and molecular diagnosis with RT-PCR (7.7%). Median age was 58 years, and the most frequent gender was male (66.6%). The most frequent comorbidities were type 2 diabetes mellitus (DM), hypertension and obesity (Table 1).

The most common symptoms (Table 2) were dyspnea, cough, malaise, and headache while the most frequent findings on physical examination (Table 3) were tachypnea, tachycardia, and fever.

Most patients presented with leukocytosis, lymphopenia, high values of C reactive protein, and D-Dimer (Table 4).

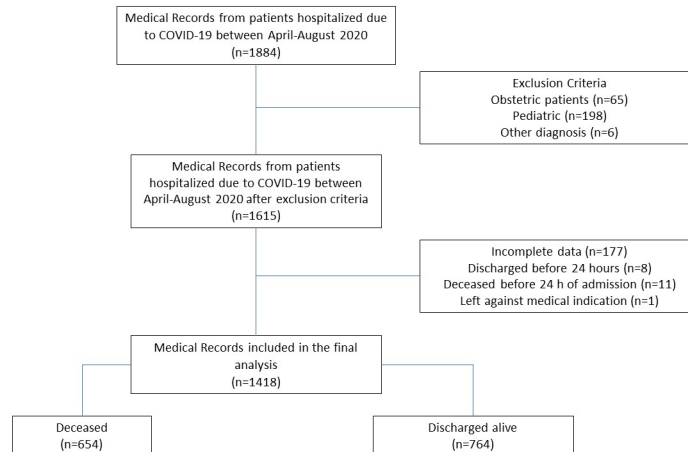

**Fig 1. Flow chart of patients included in the study.** Hospital Nacional Hipolito Unanue. April to August 2020. Lima, Peru.

<https://doi.org/10.1371/journal.pone.0264789.g001>

Pharmacological treatments most frequently used (Table 5) were ivermectin (34%) hydroxychloroquine (41.6%), azithromycin (52.7%) and corticosteroids (88.1%). The median (interquartile range) of hospitalization days was 7 (4–13) days. The mortality rate was 46%.

### Bivariate analysis

Deceased patients were significantly older than survivors (64 vs 52 years;  $p < 0.001$ ). Among the antecedents, both diabetes mellitus ( $p = 0.03$ ) and a history of surgery were associated with higher mortality ( $p < 0.001$ ). Duration of hospitalization was significantly shorter ( $p < 0.001$ ) among patients who eventually die (median 5 days; IQR 2–8) compared with those discharged alive (10 days; IQR 6–16 days). Among the symptoms, the presence of pharyngeal pain, diarrhea, nausea, and cough were associated with lower mortality, while the presence of myalgia, anorexia and dyspnea were associated with higher mortality. Regarding the findings on physical examination, an association of mortality was found with higher heart rate, respiratory rate and lower blood pressure and saturation at admission (Fig 2).

Mortality was also associated with evidence of cyanosis, intercostal retractions, and altered consciousness. Among the findings in the laboratory tests, the deceased patients presented significantly higher counts of leukocytes, and higher levels of C-reactive protein, D-dimer, alkaline phosphatase, lactate dehydrogenase, urea, creatinine and prothrombin time. On the other hand, their albumin level, lymphocyte, and platelet counts were significantly lower. With respect to pharmacological treatment, the use of ivermectin was associated with a mortality of 58% compared to 40% among those who did not receive it ( $p < 0.001$ ). Table 5 shows the pharmacological treatment received during hospitalization. Treatment with ivermectin, azithromycin, and high-dose systemic corticosteroids was found to be associated with higher mortality (Table 5 and Fig 3).

### Multivariate analysis

In the adjusted analysis (Table 6), mortality was associated with age (HR 1.02; 95%CI 1.02–1.03), history of surgery (HR 1.89; 95%CI 1.31–2.74), lower oxygen saturation at admission (HR 4.08; CI95% 2.72–8.05 for  $\text{SatO}_2 < 70\%$  compared to  $\text{SatO}_2 > 94\%$ ), the presence of poor general condition (HR 1.81; 95% CI 1.29–2.53), altered state of consciousness (HR 1.58; 95% CI 1.18–2.11) and leukocyte levels (HR 1.01; 95%CI 1.00–1.02). Treatment with ivermectin

**Table 1. Sociodemographic characteristics, history, and its association with mortality in patients with COVID-19 admitted to the Hipólito Unanue National Hospital during April to August 2020. Lima, Peru.**

| Variables                          | Mortality     |              | Total (n = 1418)* | P-value |
|------------------------------------|---------------|--------------|-------------------|---------|
|                                    | Yes (n = 654) | No (n = 764) |                   |         |
| Age                                | 64 (55–74)    | 52 (42–62)   | 58 (47–68)        | <0.001  |
| Sex                                |               |              |                   |         |
| Male                               | 449 (47.6%)   | 495 (52.4%)  | 944 (66.6%)*      | 0.124   |
| Female                             | 205 (43.3%)   | 269 (56.8%)  | 474 (33.4%)*      | -       |
| Time from disease onset (n = 1008) |               |              |                   |         |
| 5 days or less                     | 194 (54.0%)   | 165 (46.0%)  | 359 (35.6%)*      |         |
| 6 to 10 days                       | 233 (52.5%)   | 211 (47.5%)  | 444 (44.0%)*      | 0.703   |
| 11 to 15 days                      | 78 (48.8%)    | 82 (51.3%)   | 160 (15.9%)*      |         |
| More than 15 days                  | 25 (55.6%)    | 20 (44.4%)   | 45 (4.5%)*        |         |
| Frailty                            |               |              |                   |         |
| Yes                                | 42 (87.5%)    | 6 (12.5%)    | 48 (3.4%)*        | <0.001  |
| No                                 | 612 (44.7%)   | 758 (55.3%)  | 1370 (96.6%)*     | -       |
| Cancer                             |               |              |                   |         |
| Yes                                | 10 (58.8%)    | 7 (41.2%)    | 17 (1.2%)*        | 0.291   |
| No                                 | 644 (46.0%)   | 757 (54.0%)  | 1401 (98.8%)*     | -       |
| Surgery                            |               |              |                   |         |
| Yes                                | 45 (66.2%)    | 23 (33.8%)   | 68 (4.8%)*        | 0.001   |
| No                                 | 609 (45.1%)   | 741 (54.9%)  | 1350 (95.2%)*     | -       |
| Tuberculosis                       |               |              |                   |         |
| Yes                                | 33 (46.5%)    | 38 (53.5%)   | 71 (5.1%)*        | 0.951   |
| No                                 | 621 (46.1%)   | 726 (53.9%)  | 1347 (94.9%)*     | -       |
| Asthma                             |               |              |                   |         |
| Yes                                | 18 (43.9%)    | 23 (56.1%)   | 41 (2.9%)*        | 0.772   |
| No                                 | 636 (46.2%)   | 741 (53.8%)  | 1377 (97.1%)*     | -       |
| Diabetes mellitus                  |               |              |                   |         |
| Yes                                | 126 (40.7%)   | 184 (59.3%)  | 310 (21.9%)*      | 0.029   |
| No                                 | 528 (47.7%)   | 580 (52.3%)  | 1108 (78.1%)*     | -       |
| High blood pressure                |               |              |                   |         |
| Yes                                | 149 (49.8%)   | 150 (50.2%)  | 299 (21.1%)*      | 0.147   |
| No                                 | 505 (45.1%)   | 614 (54.9%)  | 1119 (78.9%)*     | -       |
| Obesity                            |               |              |                   |         |
| Yes                                | 133 (50%)     | 133 (50%)    | 266 (18.8%)*      | 0.159   |
| No                                 | 521 (45.2%)   | 631 (54.8%)  | 1152 (81.2%)*     | -       |

\*Percentage over all patients.

<https://doi.org/10.1371/journal.pone.0264789.t001>

(HR 1.44; 95%CI 1.18–1.76) and azithromycin (HR 1.25; 95%CI 1.03–1.52) were associated with higher mortality. On contrary, treatment with corticosteroids at low to moderate doses was associated with lower mortality (HR 0.56; 95%CI 0.37–0.86).

## Discussion

Our cohort showed a high mortality rate (46%) like other Peruvian hospital cohorts [5–8, 10, 11] which reported a mortality between 33% and 50%. Peru is the third country in Latin America with the highest mortality beneath Brazil and Mexico [12]. In contrast to Europe and Asia, Latin America [13] has high COVID-19 death rates. Probably one of the reasons for the high

Table 2. Symptoms reported in patients hospitalized for COVID 19 admitted to Hospital Nacional Hipólito Unanue from April to August 2020. Lima, Peru.

|                                        | Mortality     |              | Total (n = 1418)* | P-value |
|----------------------------------------|---------------|--------------|-------------------|---------|
|                                        | Yes (n = 654) | No (n = 764) |                   |         |
| <b>Respiratory symptoms</b>            |               |              |                   |         |
| Sore throat /odynophagia (n = 1416)    |               |              |                   |         |
| Yes                                    | 64 (37.2%)    | 108 (62.8%)  | 172 (12.1%)*      | 0.012   |
| No                                     | 590 (47.4%)   | 654 (52.6%)  | 1244 (87.9%)*     | -       |
| Rhinorrhea (n = 1416)                  |               |              |                   |         |
| Yes                                    | 15 (36.6%)    | 26 (63.4%)   | 41 (2.9%)*        | 0.211   |
| No                                     | 639 (46.5%)   | 736 (53.5%)  | 1391 (97.1%)*     | -       |
| Dyspnea/shortness of breath (n = 1416) |               |              |                   |         |
| Yes                                    | 546 (48.8%)   | 574 (51.2%)  | 1120 (79.1%)*     | <0.001  |
| No                                     | 108 (36.5%)   | 188 (63.5%)  | 296 (20.9%)*      | -       |
| Chest/back pain (n = 1416)             |               |              |                   |         |
| Yes                                    | 69 (44.8%)    | 85 (55.2%)   | 154 (10.9%)*      | 0.716   |
| No                                     | 585 (46.3%)   | 677 (53.7%)  | 1262 (89.1%)*     | -       |
| Cough (n = 1416)                       |               |              |                   |         |
| Yes                                    | 333 (43.4%)   | 434 (56.6%)  | 767 (54.2%)*      | 0.023   |
| No                                     | 321 (49.5%)   | 328 (50.5%)  | 649 (45.8%)*      | -       |
| <b>Gastrointestinal Symptoms</b>       |               |              |                   |         |
| Diarrhea (n = 1416)                    |               |              |                   |         |
| Yes                                    | 19 (29.7%)    | 45 (70.3%)   | 64 (4.5%)*        | 0.007   |
| No                                     | 635 (47.0%)   | 717 (53.0%)  | 1352 (95.5%)*     | -       |
| Abdominal pain (n = 1416)              |               |              |                   |         |
| Yes                                    | 23 (27.1%)    | 62 (72.9%)   | 85 (6.1%)*        | <0.001  |
| No                                     | 631 (47.41%)  | 700 (52.6%)  | 1331 (93.9%)*     | -       |
| Nausea/vomiting (n = 1416)             |               |              |                   |         |
| Yes                                    | 29 (31.9%)    | 62 (68.1%)   | 91 (6.4%)*        | 0.005   |
| No                                     | 625 (47.1%)   | 700 (52.9%)  | 1325 (93.6%)*     | -       |
| <b>General Symptoms</b>                |               |              |                   |         |
| Headache (n = 1416)                    |               |              |                   |         |
| Yes                                    | 71 (39.4%)    | 109 (60.6%)  | 180 (12.7%)*      | 0.052   |
| No                                     | 583 (47.2%)   | 653 (52.8%)  | 1236 (87.3%)*     | -       |
| Myalgias/arthralgias (n = 1416)        |               |              |                   |         |
| Yes                                    | 9 (20.0%)     | 36 (80.0%)   | 38 (2.7%)*        | <0.001  |
| No                                     | 645 (47.1%)   | 726 (52.9%)  | 1378 (97.3%)*     | -       |
| Hiporexia/anorexia (n = 1416)          |               |              |                   |         |
| Yes                                    | 30 (60.0%)    | 20 (40.0%)   | 50 (3.5%)*        | 0.046   |
| No                                     | 624 (45.7%)   | 742 (54.3%)  | 1366 (96.5%)*     | -       |
| General malaise (n = 1416)             |               |              |                   |         |
| Yes                                    | 190 (46.7%)   | 217 (53.3%)  | 407 (28.7%)*      | 0.812   |
| No                                     | 464 (46.0%)   | 545 (54.0%)  | 1009 (71.3%)*     | -       |
| Fatigue/asthenia (n = 1416)            |               |              |                   |         |
| Yes                                    | 14 (33.3%)    | 28 (66.7%)   | 42 (2.9%)*        | 0.090   |
| No                                     | 640 (46.6%)   | 734 (53.4%)  | 1374 (97.1%)*     | -       |
| Diaphoresis (n = 1416)                 |               |              |                   |         |
| Yes                                    | 6 (46.1%)     | 7 (53.9%)    | 13 (0.9%)*        | 0.998   |
| No                                     | 648 (46.2%)   | 755 (53.8%)  | 1403 (99.1%)*     | -       |

\*Percentage over total cases.

<https://doi.org/10.1371/journal.pone.0264789.t002>

**Table 3. Clinical characteristics and mortality risk in patients with COVID-19 admitted to the Hospital Nacional Hipólito Unanue from April to August 2020.** Lima, Peru.

| Variables                                 | Mortality     |               | Total (n = 1418) | P-value |
|-------------------------------------------|---------------|---------------|------------------|---------|
|                                           | Yes (n = 654) | No (n = 764)  |                  |         |
| <i>Vital signs</i>                        |               |               |                  |         |
| Systolic blood pressure (n = 642)         | 110 (100–120) | 110 (100–124) | 110 (100–120)    | 0.018   |
| Diastolic blood pressure (n = 640)        | 70 (60–70)    | 70 (60–80)    | 70 (60–78)       | 0.059   |
| Heart rate (n = 1339)                     | 101 (90–113)  | 99 (86–111)   | 100 (88–112)     | 0.002   |
| Respiratory rate (n = 949)                | 28 (23–30)    | 24 (20–28)    | 24 (22–30)       | <0.001  |
| Oxygen saturation at admission (n = 1323) |               |               |                  | <0.001  |
| ≥95%                                      | 51 (21.4%)    | 187 (78.6%)   | 238 (17.9%)*     |         |
| 90%– 94%                                  | 64 (22.9%)    | 215 (77.1%)   | 279 (21.2%)*     |         |
| 85%– 89%                                  | 76 (29.8%)    | 179 (70.2%)   | 255 (19.3%)*     |         |
| 80%– 84%                                  | 100 (55.9%)   | 79 (44.1%)    | 179 (13.5%)*     |         |
| 75%– 79%                                  | 84 (74.3%)    | 29 (25.7%)    | 113 (8.5%)*      |         |
| 70%– 74%                                  | 55 (73.3%)    | 20 (26.7%)    | 75 (5.7%)*       |         |
| <70%                                      | 164 (89.1%)   | 20 (10.9%)    | 184 (13.9%)*     |         |
| <i>Physical Examination</i>               |               |               |                  |         |
| Cyanosis (n = 1416)                       |               |               |                  |         |
| Yes                                       | 14 (93.3%)    | 1 (6.7%)      | 15 (1.1%)*       | <0.001  |
| No                                        | 640 (45.7%)   | 761 (54.3%)   | 1401 (98.9%)*    | -       |
| Fever (n = 1418)                          |               |               |                  |         |
| Yes                                       | 224 (44.4%)   | 280 (55.6%)   | 504 (35.5%)*     | 0.347   |
| No                                        | 430 (47.1%)   | 484 (52.9%)   | 914 (64.5%)*     | -       |
| Pallor (n = 1416)                         |               |               |                  |         |
| Yes                                       | 19 (59.4%)    | 13 (40.6%)    | 32 (2.3%)*       | 0.130   |
| No                                        | 635 (45.9%)   | 749 (54.1%)   | 1384 (97.7%)*    | -       |
| Retractions (n = 1416)                    |               |               |                  |         |
| Yes                                       | 23 (71.9%)    | 9 (28.1%)     | 32 (2.3%)*       | 0.003   |
| No                                        | 631 (45.6%)   | 753 (54.4%)   | 1384 (97.7%)*    | -       |
| Poor general condition (n = 1416)         |               |               |                  |         |
| Yes                                       | 81 (84.4%)    | 15 (15.6%)    | 96 (6.8%)*       | <0.001  |
| No                                        | 573 (43.4%)   | 747 (56.6%)   | 1320 (93.2%)*    | -       |
| Alteration of consciousness (n = 1416)    |               |               |                  |         |
| Yes                                       | 100 (74.1%)   | 35 (25.9%)    | 135 (9.5%)*      | <0.001  |
| No                                        | 554 (43.2%)   | 727 (56.8%)   | 1281 (90.5%)*    | -       |

\*Percentage over total.

<https://doi.org/10.1371/journal.pone.0264789.t003>

mortality rate is the socioeconomic and demographic inequality that Latin America faces [14] leading to inequitable access to poorly prepared health services with extremely limited access to critical care. In fact, only 4% of patients in our cohort were hospitalized in intensive care services despite the large percentage of patients with requirement of being admitted to these units. Another factor that could explain the high mortality was hypoxemia on admission, in accordance with what was described by Bahl et al. [15], Dienderé et al. [16] and Mejia et al. [7]. Most of the hospitalized patients had decreased arterial oxygen saturation levels, with an increase in mortality proportional to the degree of hypoxemia. This reflects a late admission which can be explained due to lack of access to hospital beds. Another associated factor was advanced age, also shown in other studies [17]. Advanced age is associated with decline in



**Table 4. Laboratory findings in patients with COVID-19 admitted to the Hospital Nacional Hipólito Unanue from April to August 2020. Lima, Peru.**

| Variables (at admission)                     | Mortality             |                     | Total (n = 1418)     | P-value |
|----------------------------------------------|-----------------------|---------------------|----------------------|---------|
|                                              | Yes (n = 654)         | No (n = 764)        |                      |         |
| leukocytes x 10 <sup>3</sup> /μL (n = 1304)  | 14 (10.4–18)          | 10.4 (7.8–14.2)     | 11.7 (8.7–16)        | <0.001  |
| lymphocytes x 10 <sup>3</sup> /μL (n = 1303) | 0.7 (0.5–1.1)         | 1 (0.6–1.4)         | 0.9 (0.6–1.3)        | <0.001  |
| Neutrophils x 10 <sup>3</sup> /μL (n = 1080) | 12.3 (8.8–16.6)       | 8.65 (6.2–12.4)     | 10.4 (7.2–14.8)      | <0.001  |
| Platelets x 10 <sup>3</sup> /μL (n = 1310)   | 268 (205–351)         | 308.5 (239–390)     | 288.5 (225–378)      | <0.001  |
| Hemoglobin gr/dL (n = 1310)                  | 13.3 (12.2–14.5)      | 13.2 (12.2–14.3)    | 13.3 (12.2–14.4)     | 0.199   |
| PCR (n = 1091)                               | 18.1 (10.2–25.1)      | 12.4 (4.8–19.9)     | 15.0 (6.6–22.3)      | <0.001  |
| D-Dimer (n = 926)                            | 2.1 (1.0–5.1)         | 1.0 (0.6–2.0)       | 1.4 (0.7–3.8)        | <0.001  |
| Fibrinogen (n = 989)                         | 729 (582–889)         | 727.5 (598–875.5)   | 728 (593–881)        | 0.822   |
| Ferritin (n = 196)                           | 1012.4 (595.9–1722.2) | 865 (544.5–1329)    | 938.2 (574.1–1493.7) | 0.119   |
| Lactate dehydrogenase (n = 856)              | 461.9 (371.9–612.1)   | 313.6 (246.7–415.1) | 385.9 (284.6–509.1)  | <0.001  |
| Aspartate aminotransferase (n = 989)         | 45.9 (30.4–67.7)      | 40.7 (24.6–68)      | 43 (27.4–68)         | 0.007   |
| Alanine aminotransferase (n = 988)           | 46.8 (29.1–80.1)      | 55.1 (29.1–93.8)    | 49.6 (29.1–88.5)     | 0.023   |
| Alkaline phosphatase (n = 973)               | 127.1 (96.1–176.2)    | 113.6 (84.9–160.3)  | 119.1 (90–168.5)     | <0.001  |
| Gamma Glutamyl Transpeptidase (n = 965)      | 93.1 (44.3–184)       | 101 (49.4–195.1)    | 95.4 (47.3–192.6)    | 0.162   |
| Albumin (n = 969)                            | 3.1 (2.8–3.4)         | 3.4 (3.1–3.7)       | 3.2 (2.9–3.6)        | <0.001  |
| Prothrombin time (seconds) (n = 996)         | 15.5 (14.3–16.9)      | 14.6 (13.7–15.6)    | 15 (14–16.3)         | <0.001  |
| International Normalized Ratio (n = 990)     | 1.2 (1.1–1.3)         | 1.1 (1.1–1.2)       | 1.1 (1.1–1.2)        | <0.001  |
| Glucose (n = 999)                            | 136.7 (109.5–182.6)   | 128.9 (103.9–179.3) | 132.8 (106.1–181.2)  | 0.105   |
| Urea (n = 1162)                              | 43.0 (31.5–65.1)      | 30.8 (23–42.8)      | 35.6 (25.5–52.4)     | <0.001  |
| Creatinine (n = 1178)                        | 0.74 (0.6–1.01)       | 0.67 (0.55–0.81)    | 0.69 (0.57–0.87)     | <0.001  |

<https://doi.org/10.1371/journal.pone.0264789.t004>

**Table 5. Treatment in patients with COVID-19 admitted to the Hospital Nacional Hipólito Unanue from April to August 2020. Lima, Peru.**

| Variable                                     | Mortality     |              | Total (n = 1418) | P-value |
|----------------------------------------------|---------------|--------------|------------------|---------|
|                                              | Yes (n = 654) | No (n = 764) |                  |         |
| <b>Ivermectin</b>                            |               |              |                  |         |
| Yes                                          | 280 (57.9%)   | 204 (42.2%)  | 484 (34.2%)*     | <0.001  |
| No                                           | 374 (40.0%)   | 560 (60.0%)  | 934 (65.8%)*     | -       |
| <b>Hydroxychloroquine</b>                    |               |              |                  |         |
| Yes                                          | 292 (49.5%)   | 298 (50.5%)  | 590 (41.6%)*     | 0.032   |
| No                                           | 362 (43.7%)   | 466 (56.3%)  | 828 (58.4%)*     | -       |
| <b>Azithromycin</b>                          |               |              |                  |         |
| Yes                                          | 352 (52.7%)   | 316 (47.31%) | 668 (47.1%)*     | <0.001  |
| No                                           | 302 (40.3%)   | 448 (59.7%)  | 750 (52.9%)*     | -       |
| <b>Systemic corticosteroids** (n = 1417)</b> |               |              |                  |         |
| No corticosteroids                           | 125 (28.9%)   | 308 (71.1%)  | 433 (30.5%)*     | -       |
| < 50mg/day                                   | 50 (29.8%)    | 118 (70.2%)  | 168 (11.9%)*     | <0.001  |
| ≥50mg/day                                    | 479 (58.7%)   | 337 (41.3%)  | 816 (57.6%)*     |         |
| <b>Admission to the ICU (n = 1190)</b>       |               |              |                  |         |
| Yes                                          | 31 (67.4%)    | 15 (32.6%)   | 46 (3.9%)*       | 0.084   |
| No                                           | 623 (54.5%)   | 521 (45.5%)  | 1144 (96.1%)*    | -       |

\*Percentage according to total observations

\*\*methylprednisolone dose equivalent.

<https://doi.org/10.1371/journal.pone.0264789.t005>



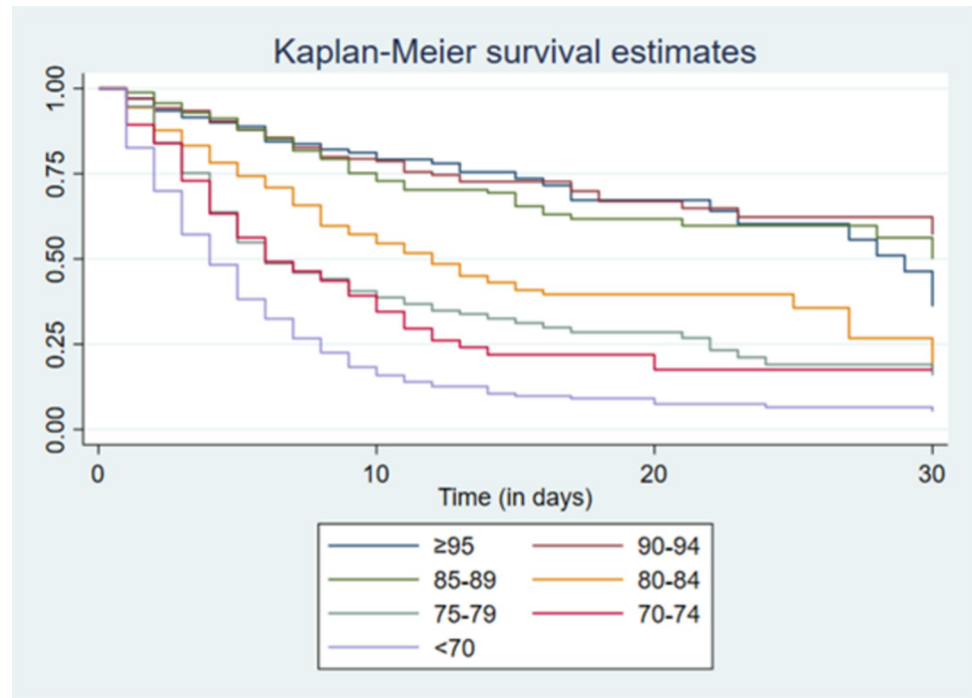

**Fig 2. Kaplan-Meier survival curves comparing oxygen saturation of hemoglobin (SaO2) at admission in patients hospitalized with COVID-19 between April and August 2020 in Hospital Nacional Hipolito Unanue. Lima, Peru. Log rank test:  $p < 0,001$ .**

<https://doi.org/10.1371/journal.pone.0264789.g002>

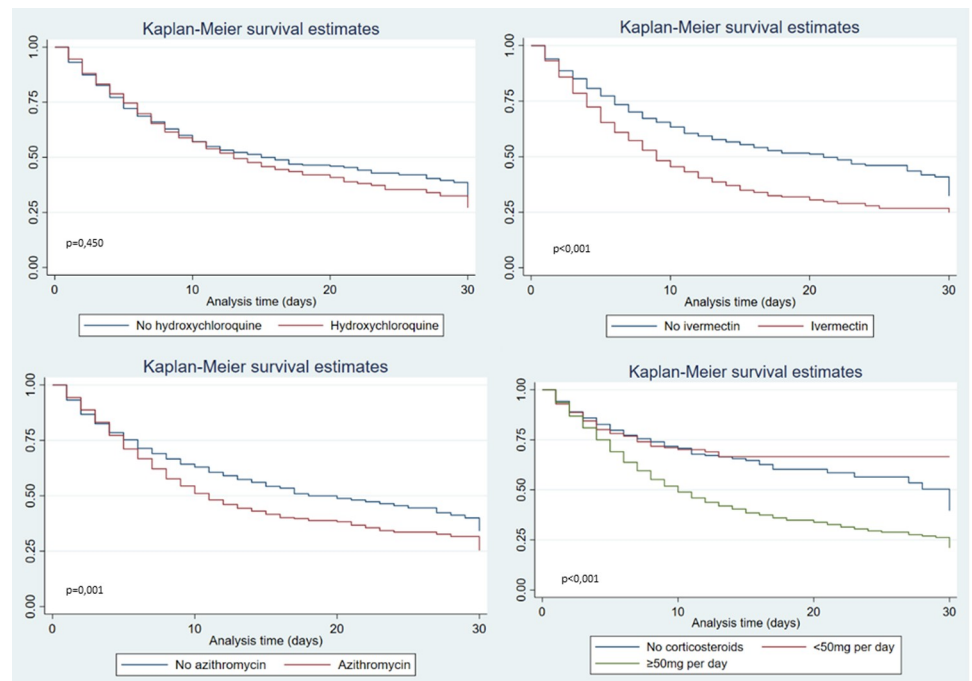

**Fig 3. Kaplan-Meier survival curves comparing treatment used in in patients hospitalized with COVID-19 between April and August 2020 in Hospital Nacional Hipolito Unanue. Lima, Peru. P values shown are based on log rank-test.**

<https://doi.org/10.1371/journal.pone.0264789.g003>

**Table 6. Mortality risk factors in COVID-19 patients hospitalized at Hospital Nacional Hipólito Unanue from April to August 2020. Results from multivariate analysis.**

| Variable                                | HRc (IC95%)      | p value | HRa (IC95%)      | p value |
|-----------------------------------------|------------------|---------|------------------|---------|
| Age                                     | 1.04 (1.03–1.04) | <0.001  | 1.02 (1.02–1.03) | <0.001  |
| Sore throat/odynophagia (n = 1416)      | 0.68 (0.53–0.88) | 0.004   | 0.90 (0.65–1.25) | 0.531   |
| Myalgias/arthralgias (n = 1416)         | 0.39 (0.20–0.75) | 0.005   | 0.39 (0.16–0.96) | 0.040   |
| Cough (n = 1416)                        | 0.78 (0.67–0.91) | 0.002   | 0.87 (0.71–1.06) | 0.166   |
| Heart rate (n = 1339)                   | 1.01 (1.00–1.01) | 0.001   | 1.00 (0.99–1.01) | 0.701   |
| Oxygen Saturation                       |                  |         |                  |         |
| ≥95%                                    | Ref.             | -       | Ref.             | -       |
| 90%– 94%                                | 0.94 (0.65–1.35) | 0.727   | 0.86 (0.55–1.34) | 0.497   |
| 85%– 89%                                | 1.09 (0.77–1.56) | 0.623   | 1.05 (0.68–1.61) | 0.833   |
| 80%– 84%                                | 2.22 (1.59–3.12) | <0.001  | 1.96 (1.29–2.97) | 0.002   |
| 75%– 79%                                | 3.26 (2.31–4.63) | <0.001  | 2.78 (1.82–4.25) | <0.001  |
| 70%– 74%                                | 3.72 (2.54–5.45) | <0.001  | 3.31 (2.06–5.32) | <0.001  |
| <70%                                    | 5.86 (4.28–8.03) | <0.001  | 4.07 (2.72–6.09) | <0.001  |
| <b>History and Physical Examination</b> |                  |         |                  |         |
| Cyanosis (n = 1416)                     | 3.95 (2.32–6.72) | <0.001  | 1.98 (0.86–4.58) | 0.109   |
| Fever (n = 1418)                        | 0.89 (0.75–1.04) | 0.145   | 1.07 (0.87–1.32) | 0.514   |
| Poor general condition (n = 1416)       | 3.17 (2.51–4.00) | <0.001  | 1.80 (1.29–2.51) | 0.001   |
| Alteration of consciousness (n = 1416)  | 2.51 (2.03–3.11) | <0.001  | 1.58 (1.18–2.11) | 0.002   |
| <b>Symptoms</b>                         |                  |         |                  |         |
| Sore throat/odynophagia (n = 1416)      | 0.68 (0.53–0.88) | 0.004   | 0.90 (0.65–1.25) | 0.531   |
| Myalgias/arthralgias (n = 1416)         | 0.39 (0.20–0.75) | 0.005   | 0.39 (0.16–0.96) | 0.040   |
| Cough (n = 1416)                        | 0.78 (0.67–0.91) | 0.002   | 0.87 (0.71–1.06) | 1.166   |
| <b>Laboratory findings</b>              |                  |         |                  |         |
| Leucocytes x10 <sup>3</sup> (n = 1304)  | 1.01 (1.01–1.01) | <0.001  | 1.01 (1.00–1.02) | 0.010   |
| Lymphocytes x10 <sup>3</sup> (n = 1303) | 0.80 (0.70–0.91) | <0.001  | 1.01 (0.88–1.15) | 0.892   |
| Platelets (n = 1310)                    | 0.99 (0.99–0.99) | <0.001  | 0.99 (0.99–0.99) | <0.001  |
| Urea per 10mg/dL (n = 1162)             | 1.04 (1.02–1.05) | <0.001  | 1.03 (1.00–1.05) | 0.004   |
| <b>Medical History</b>                  |                  |         |                  |         |
| Previous Surgery (n = 1418)             | 1.74 (1.29–2.36) | <0.001  | 1.86 (1.29–2.70) | 0.001   |
| Diabetes mellitus (n = 1418)            | 0.87 (0.71–1.05) | 0.146   | Not included     | -       |
| <b>Drug treatment</b>                   |                  |         |                  |         |
| Ivermectin (n = 1418)                   | 1.60 (1.36–1.85) | <0.001  | 1.41 (1.16–1.72) | <0.001  |
| Azithromycin (n = 1418)                 | 1.30 (1.12–1.52) | 0.001   | 1.25 (1.03–1.53) | 0.021   |
| Hydroxychloroquine (n = 1418)           | 1.06 (0.91–1.23) | 0.463   | Not included     | -       |
| Systemic Corticosteroids (n = 1417)*    |                  |         |                  |         |
| No corticosteroids                      | Ref.             | -       | Ref.             | -       |
| Less than 50mg/day                      | 0.87 (0.62–1.20) | 0.386   | 0.56 (0.36–0.86) | 0.008   |
| ≥ 50mg/day                              | 1.85 (1.52–2.26) | <0.001  | 1.04 (0.78–1.39) | 0.776   |

HRc: Crude Hazard Ratio HRa: adjusted Hazard Ratio

\*methylprednisolone dose equivalent.

<https://doi.org/10.1371/journal.pone.0264789.t006>

both humoral and cellular immune responses [18], and if fragility is added, we will have even more ominous figures. In fact, we found a mortality rate in frail older adults of 88%, a figure consisting with other reports [19–21].

Comorbidities such as diabetes, hypertension and obesity were not significantly associated with mortality in both bivariate and multivariate analyses, in contrast to what was reported by

Corona et al. [22] Escobedo-de la Peña et al. [23] and Poly et al. [24]. Although it could be hypothesized that there were undiagnosed patients with those comorbidities at admission, both blood pressure and glycemia at admission did not show association with mortality. Peruvian studies found contradictory results regarding these factors as predictors of mortality in patients hospitalized for COVID-19 [5, 7, 25]. Latin American studies found mixed results. A Mexican study found that DM and obesity, but not hypertension, were associated with mortality in hospitalized patients [26]; while a nationwide study in Brazil found an association with diabetes and hypertension, but not with obesity [27] and a Chilean study showed that obesity, but not diabetes mellitus was an independent risk factor for mortality [28].

One hypothesis that could explain these results is that these conditions may be associated with the risk of being hospitalized in the general population, but that they do not necessarily have an association with mortality in patients with already severe COVID-19, which was the condition of the majority of our patients. A study in around 4000 critical patients in Italy found no association with hypertension [29], and other studies in critical patients found no association between mortality and diabetes [30, 31] or obesity [32, 33]. Some authors suggest that this could be due to the "obesity paradox" or "diabetes paradox", hypotheses that suggest that these conditions are not a risk factor for mortality in already critically ill patients, as has been widely seen in other diseases [34, 35]. However, these hypotheses are still controversial and are not entirely clear in the COVID-19 context.

Due to resource constraints, we were not able to evaluate cardiovascular markers like troponins, nor had electrocardiographic and echocardiographic data which could have allowed us to properly assess cardiovascular disease, which has been correlated with an increased risk of COVID-19 infection and poorer prognosis [36, 37], increasing mortality risk up to three times according to two recent meta-analysis [38, 39].

Hematological and biochemical alterations in COVID-19 [40] have proven useful in the stratification of COVID-19 patients, and many of these have served as predictors of mortality. Regarding hematological findings, mortality was associated with leukocytosis and lower numbers of lymphocytes and platelets, as well as significantly higher levels of D-dimer and lactate dehydrogenase. Those findings are consistent with previous studies [36, 37].

Although several clinical trials are underway, and the benefit of some drugs like moderate doses of corticosteroids and tocilizumab in patients with severe cases, no drug can cure or prevent COVID-19. One striking finding of our cohort was the association between the pharmacological treatments provided and mortality. The association between ivermectin use and mortality is of concern. Although treatment with this drug has been advocated by some members of the medical community, and even included in Peruvian national guidelines, there is no evidence of its usefulness. Moreover, a tendency to higher mortality was found with the use of this drug [41]. As for hydroxychloroquine—an antimalarial currently used in lupus erythematosus and rheumatoid arthritis—widely used during the first wave of the pandemic, our findings suggest not only its ineffectiveness but its possible deleterious effect. The Solidarity [42] clinical trial also showed a trend towards higher mortality. Although caution was suggested against the indiscriminate use of this drug [43], its use continued for several months. A previous study conducted in hospitals of the Social Health Security of Peru—EsSalud, showed that the use of ivermectin, azithromycin and hydroxychloroquine were not effective against COVID-19, and were even associated with higher mortality [41]. One of the few drugs that has shown evidence in decreasing mortality in hypoxemic patients is dexamethasone [44, 45]. Our results show a consistent effect in cases of low to moderate dose corticosteroids, while higher doses were associated with higher mortality in the bivariate analysis (although not in the adjusted analysis). The use of high doses should therefore be assessed only in the context of clinical trials. These findings should lead us to reflect on the use of drugs without evidence, which unfortunately

has been one of the interventions promoted even as a national policy against COVID-19 [46]. The use of interventions without scientific support, even in health emergency situations such as the one experienced, should not be repeated.

Our study presents as limitations the difficulty in obtaining a diagnosis by molecular methods in most patients. Most patients presented a diagnosis based on a typical radiological clinical picture and/or a positive serology. However, in the context of the huge epidemic faced and the very high incidence of COVID-19 during the study period, it is unlikely that an appreciable proportion of patients with other pathologies were included in the cohort. Another limitation is the retrieval of clinical data on acutely and severely ill patients. Moreover, physical examination is often limited in the context of the biosecurity measures necessary for the care of these patients and diagnostic aids are not always available. However, working conditions in a pandemic context are far from ideal and we consider that our data not only represent a valuable contribution to understanding the hospital epidemiology of COVID-19, but also allow us to analyze the association of clinical variables and treatments and their impact with mortality during the so-called first wave of COVID-19 in Peru.

## Conclusion

Patients hospitalized for COVID-19 during the first wave in a Peruvian national reference hospital presented a high mortality. A low SaO<sub>2</sub> at admission, age, and the presence of hematological and biochemical alterations were associated with higher mortality. The use of drugs with purported antiviral activity such as hydroxychloroquine, ivermectin or azithromycin was not useful and is probably associated with unfavorable outcomes. The use of corticosteroids at moderate doses was associated with lower mortality. However, high doses were not associated with a better prognosis and are probably associated with higher mortality.

## Supporting information

### S1 Data.

(DTA)

## Author Contributions

**Conceptualization:** Alonso Soto, Dante M. Quiñones-Laveriano, Johan Azañero, Rafael Chumpitaz, José Claros, Lucia Salazar, Andres Alcantara.

**Data curation:** Alonso Soto, Dante M. Quiñones-Laveriano, Rafael Chumpitaz, José Claros, Lucia Salazar, Oscar Rosales, Liz Nuñez, David Roca, Andres Alcantara.

**Formal analysis:** Alonso Soto, Dante M. Quiñones-Laveriano, Johan Azañero.

**Investigation:** Alonso Soto, Dante M. Quiñones-Laveriano, Johan Azañero, Rafael Chumpitaz, José Claros, Lucia Salazar, Oscar Rosales, Liz Nuñez, David Roca, Andres Alcantara.

**Methodology:** Alonso Soto, Dante M. Quiñones-Laveriano.

**Software:** Alonso Soto.

**Supervision:** Alonso Soto.

**Validation:** Alonso Soto.

**Visualization:** Alonso Soto.

**Writing – original draft:** Alonso Soto, Dante M. Quiñones-Laveriano.

**Writing – review & editing:** Alonso Soto, Dante M. Quiñones-Laveriano, Johan Azañero, Rafael Chumpitaz, José Claros, Lucia Salazar, Oscar Rosales, Liz Nuñez, David Roca, Andres Alcantara.

## References

1. Okereke M, Ukor NA, Adebisi YA, Ogunkola IO, Iyagbaye EF, Owzor GA, et al. Impact of COVID-19 on access to healthcare in low- and middle-income countries: Current evidence and future recommendations. *Int J Health Plann Manage*. 2021; 36(1):13–7. <https://doi.org/10.1002/hpm.3067> PMID: 32857892
2. Neyra-León J, Huancahuari-Nuñez J, Díaz-Monge JC, Pinto JA. The impact of COVID-19 in the health-care workforce in Peru. *J Public Health Policy*. 2021; 42:182–4. <https://doi.org/10.1057/s41271-020-00259-6> PMID: 33028932
3. World Health Organization. Weekly epidemiological update on COVID-19—28 December 2021 [Internet]. Emergency Situational Updates. [Accessed 10 January 2022] Available from: <https://www.who.int/publications/m/item/weekly-epidemiological-update-on-covid-19—28-december-2021#:~:text=Weekly%20epidemiological%20update%20on%20COVID%2D19%20%2D%2028%20December%202021,-Edition%2072&text=This%20corresponds%20to%20just%20under,Omicron%20variant%20is%20also%20provided>.
4. Ministerio de Salud. Minsa: Casos confirmados por coronavirus COVID-19 ascienden a 1 804 915 en el Perú (Comunicado N°510) [Internet]. Noticias. 2021. [Accessed 10 January 2022]. Available from: <https://www.gob.pe/institucion/minsa/noticias/490477-minsa-casos-confirmados-por-coronavirus-covid-19-ascienden-a-1-804-915-en-el-peru-comunicado-n-510>
5. Navarrete-Mejía PJ, Lizaraso-Soto FA, Velasco-Guerrero JC, Loro-Chero LM. Diabetes mellitus e hipertensión arterial como factor de riesgo de mortalidad en pacientes con Covid-19. *Rev Cuerpo Méd Hosp Nac Almanzor Aguinaga Asenjo*. 2021; 13(4):361–5. <http://dx.doi.org/10.35434/rcmhnaaa.2020.134.766>
6. Rodríguez-Zúñiga MJM, Quintana-Aquehua A, Díaz-Lajo VH, Charaja-Coata KS, Becerra-Bonilla WS, Cueva-Tovar K, et al. Factores de riesgo asociados a mortalidad en pacientes adultos con neumonía por SARS-CoV-2 en un hospital público de Lima, Perú. *Acta Médica Peru*. 2020; 37(4):437–46. <http://dx.doi.org/10.35663/amp.2020.374.1676>
7. Mejía F, Medina C, Cornejo E, Morello E, Vásquez S, Alave J, et al. Oxygen saturation as a predictor of mortality in hospitalized adult patients with COVID-19 in a public hospital in Lima, Peru. *PLOS ONE*. 2020; 15(12):e0244171. <https://doi.org/10.1371/journal.pone.0244171> PMID: 33370364
8. Vences MA, Pareja-Ramos JJ, Otero P, Veramendi-Espinoza LE, Vega-Villafana M, Mogollón-Lavi J, et al. Factores asociados a mortalidad en pacientes hospitalizados con COVID-19: cohorte prospectiva en un hospital de referencia nacional de Perú. *Medwave*. 2021; 21(06):e8231. <https://doi.org/10.5867/medwave.2021.06.8231> PMID: 34292921
9. Danwang C, Endomba FT, Nkeck JR, Wouna DLA, Robert A, Noubiap JJ. A meta-analysis of potential biomarkers associated with severity of coronavirus disease 2019 (COVID-19). *Biomark Res*. 2020; 8(1):37. <https://doi.org/10.1186/s40364-020-00217-0> PMID: 32879731
10. Hueda-Zavaleta M, Copaja-Corzo C, Bardales-Silva F, Flores-Palacios R, Barreto-Rocchetti L, Benites-Zapata VA. Factores asociados a la muerte por COVID-19 en pacientes admitidos en un hospital público en Tacna, Perú. *Rev Peru Med Exp Salud Publica*. 2021; 38(2):214–223. <https://doi.org/10.17843/rpmesp.2021.382.7158> PMID: 34468567
11. Yupari-Azabache I, Bardales-Aguirre L, Rodríguez-Azabache J, Barros-Sevillano JS, Rodríguez-Díaz Á. Factores de riesgo de mortalidad por COVID-19 en pacientes hospitalizados: Un modelo de regresión logística. *Rev Fac Med Humana*. 2021; 21(1):19–27. <http://dx.doi.org/10.25176/rfmh.v21i1.3264>
12. World Health Organization. Situation by Region, Country, Territory & Area [Internet]. WHO Coronavirus (COVID-19) Dashboard. 2021 [Accessed 10 January 2022]. Available on: <https://covid19.who.int/table>
13. Lancet The. COVID-19 in Latin America: a humanitarian crisis. *The Lancet*. 2020; 396(10261):1463. [https://doi.org/10.1016/S0140-6736\(20\)32328-X](https://doi.org/10.1016/S0140-6736(20)32328-X) PMID: 33160550
14. Cifuentes MP, Rodríguez-Villamizar LA, Rojas-Botero ML, Alvarez-Moreno CA, Fernández-Niño JA. Socioeconomic inequalities associated with mortality for COVID-19 in Colombia: a cohort nationwide study. *J Epidemiol Community Health*. 2021; 75:610–5. <https://doi.org/10.1136/jech-2020-216275> PMID: 33674459
15. Bahl A, Van Baalen MN, Ortiz L, Chen N-W, Todd C, Milad M, et al. Early predictors of in-hospital mortality in patients with COVID-19 in a large American cohort. *Intern Emerg Med*. 2020; 15(8):1485–99. <https://doi.org/10.1007/s11739-020-02509-7> PMID: 32970246

16. Diendéré EA, Sondo KA, Ouédraogo AR, Dahourou DL, Cissé K, Sawadogo A, et al. Predictors of severe hypoxemia among COVID-19 patients in Burkina Faso (West Africa): Findings from hospital based cross-sectional study. *Int J Infect Dis.* 2021; 108:289–95. <https://doi.org/10.1016/j.ijid.2021.04.007> PMID: 33894354
17. Mehraeen E, Karimi A, Barzegary A, Vahedi F, Afsahi AM, Dadras O, et al. Predictors of mortality in patients with COVID-19—a systematic review. *Eur J Integr Med.* 2020; 40:101226. <https://doi.org/10.1016/j.eujim.2020.101226> PMID: 33101547
18. Opal SM, Girard TD, Ely EW. The Immunopathogenesis of sepsis in elderly patients. *Clin Infect Dis.* 2005; 41(Supplement 7):S504–12. <https://doi.org/10.1086/432007> PMID: 16237654
19. Ribeiro Barbosa I, Rodrigues Galvão MH, Araújo de Souza T, Gomes SM, de Almeida Medeiros A, Costa de Lima K. Incidence of and mortality from COVID-19 in the older Brazilian population and its relationship with contextual indicators: an ecological study. *Rev Bras Geriatr E Gerontol.* 2020; 23(1): e200171. <https://doi.org/10.1590/1981-22562020023.200171>
20. Kang S-J, Jung SI. Age-Related Morbidity and Mortality among Patients with COVID-19. *Infect Chemother.* 2020; 52(2):154–64. <https://doi.org/10.3947/ic.2020.52.2.154> PMID: 32537961
21. Yanez ND, Weiss NS, Romand J-A, Treggiari MM. COVID-19 mortality risk for older men and women. *BMC Public Health.* 2020; 20(1):1742. <https://doi.org/10.1186/s12889-020-09826-8> PMID: 33213391
22. Corona G, Pizzocaro A, Vena W, Rastrelli G, Semeraro F, Isidori AM, et al. Diabetes is most important cause for mortality in COVID-19 hospitalized patients: Systematic review and meta-analysis. *Rev Endocr Metab Disord.* 2021; 22(2):275–96. <https://doi.org/10.1007/s11154-021-09630-8> PMID: 33616801
23. Escobedo-de la Peña J, Rascón-Pacheco RA, Ascencio-Montiel I de J, González-Figueroa E, Fernández-Gárate JE, Medina-Gómez OS, et al. Hypertension, Diabetes and Obesity, Major Risk Factors for Death in Patients with COVID-19 in Mexico. *Arch Med Res.* 2021; 52(4):443–9. <https://doi.org/10.1016/j.arcmed.2020.12.002> PMID: 33380361
24. Poly TN, Islam MdM, Yang HC, Lin MC, Jian W-S, Hsu M-H, et al. Obesity and Mortality Among Patients Diagnosed With COVID-19: A Systematic Review and Meta-Analysis. *Front Med.* 2021; 8:620044. <https://doi.org/10.3389/fmed.2021.620044> PMID: 33634150
25. Díaz-Vélez C, Urrunaga-Pastor D, Romero-Cerdán A, et al. Risk factor for mortality in hospitalized patients with COVID-19 from three hospitals in Peru: a retrospective cohort study [Version 1; peer review: 2 approved]. *F1000Research.* 2021; 10:224. <https://doi.org/10.12688/f1000research.51474.1> PMID: 34211701
26. Olivas-Martínez A, Cárdenas-Fragoso JL, Jiménez JV, et al. In-hospital mortality from severe COVID-19 in a tertiary center in Mexico City; causes of death, risk factors and impact of hospital saturation. *PLOS ONE.* 2021; 16(2): e0245772. <https://doi.org/10.1371/journal.pone.0245772> PMID: 33534813
27. Marcolino M, Ziegelmann P, Souza-Silva M, et al. Clinical characteristics and outcomes of patients hospitalized with COVID-19 in Brazil: Results from the Brazilian COVID-19 registry. *International Journal of infectious diseases.* 2021; 107:300–310. <https://doi.org/10.1016/j.ijid.2021.01.019> PMID: 33444752
28. Vial MR, Peters A, Pérez I, et al. COVID-19 in South America: clinical epidemiological characteristics among 381 patients during the early phase of the pandemic in Santiago, Chile. *BMC Infect Dis.* 2020; 20(955). <https://doi.org/10.1186/s12879-020-05665-5>
29. Grasselli G, Greco M, Zanella A, Albano G, Antonelli M, Bellani G, et al. Risk Factors Associated With Mortality Among Patients With COVID-19 in Intensive Care Units in Lombardy, Italy. *JAMA Intern Med.* 2020; 180(10):1345–55. <https://doi.org/10.1001/jamainternmed.2020.3539> PMID: 32667669
30. Hu C, Liu Z, Jiang Y, et al. Early prediction of mortality risk among patients with severe COVID-19, using machine learning. *Int J Epidemiol.* 2021; 49(6):1918–1929. <https://doi.org/10.1093/ije/dyaa171> PMID: 32997743
31. Bo C, Hong-Qui G, Yi L, et al. A model to predict the risk of mortality in severely ill COVID-19 patients. *Computational and structural biotechnology journal.* 2021; 19:1694–1700. <https://doi.org/10.1016/j.csbj.2021.03.012> PMID: 33777331
32. Price-Haywood EG, Burton J, Fort D, Seoane L. Hospitalization and Mortality among Black Patients and White Patients with Covid-19. *N Engl J Med.* 2020; 382(26):2534–43. <https://doi.org/10.1056/NEJMsa2011686> PMID: 32459916
33. Dana R, Bannay A, Bourst P, et al. obesity and mortality in critically ill COVID-19 patients with respiratory failure. *Int J Obesity.* 2021; 45:2028–2037. <https://doi.org/10.1038/s41366-021-00872-9> PMID: 34112941
34. Krinley JS, Fisher M. The diabetes paradox: diabetes is not independently associated with mortality in critical ill patients. *Hospital practice.* 2012; 40(2):31–35. <https://doi.org/10.3810/hp.2012.04.967> PMID: 22615076



35. Karampela I, Chrysanthopoulou E, Christodoulatos SG, Dalamaga M. Is there an obesity paradox in critical illness? Epidemiologic and metabolic considerations. *Obes Rep.* 2020; 9:231–244. <https://doi.org/10.1007/s13679-020-00394-x> PMID: 32564203
36. Lelapi N, Licastro N, Provenzano M, et al. Cardiovascular disease as a biomarker for an increased risk of COVID-19 infection and related poor prognosis. *Biomark Med.* 2020; 14(9):713–716. <https://doi.org/10.2217/bmm-2020-0201> PMID: 32426991
37. Zhou F, Yu T, Du R, Fan G, Liu Y, Liu Z, et al. Clinical course and risk factors for mortality of adult inpatients with COVID-19 in Wuhan, China: a retrospective cohort study. *The Lancet.* 2020; 395(10229):1054–62. [https://doi.org/10.1016/S0140-6736\(20\)30566-3](https://doi.org/10.1016/S0140-6736(20)30566-3) PMID: 32171076
38. Aggarwal G, Cheruiyot I, Aggarwal S, et al. Association of cardiovascular diseases with coronavirus disease 2019 (COVID-19) severity: a meta-analysis. *Current Problems in Cardiology.* 2020; 45(8). <https://doi.org/10.1016/j.cpcardiol.2020.100617> PMID: 32402515
39. Bae S, So K, Mi-Na K, et al. Impact of cardiovascular disease and risk factors on fatal outcomes in patients with COVID-19 according to age: systematic review and meta-analysis. *Heart.* 2021; 107:373–380. <https://doi.org/10.1136/heartjnl-2020-317901> PMID: 33334865
40. Pascual Gómez NF, Lobo IM, Granero Cremades I, Figuerola Tejerina A, Ramasco Rueda F, von Wernitz Teleki A, et al. Potenciales biomarcadores predictores de mortalidad en pacientes COVID-19 en el Servicio de Urgencias. *Rev Esp Quimioter.* 2020; 33(4):267–73. <https://doi.org/10.37201/req/060.2020> PMID: 32657550
41. Soto-Becerra P, Culquichicón C, Hurtado-Roca Y, Araujo-Castillo RV. Real-world effectiveness of hydroxychloroquine, azithromycin, and ivermectin among hospitalized COVID-19 patients: results of a target trial emulation using observational data from a nationwide healthcare system in Peru [Internet]. medRxiv [Preprint]. 2020 [Accessed 10 January 2022]. <https://doi.org/10.1101/2020.04.15.20064931> PMID: 32511587
42. WHO Solidarity Trial Consortium. Repurposed Antiviral Drugs for Covid-19—Interim WHO Solidarity Trial Results. *N Engl J Med.* 2021; 384(6):497–511. <https://doi.org/10.1056/NEJMoa2023184> PMID: 33264556
43. Soto A. Cuando la vehemencia supera la evidencia: el caso del uso de hidroxycloquina para el tratamiento del COVID-19. *Acta Médica Peru.* 2020; 37(1):110–1. <https://doi.org/10.35663/amp.2020.371.914>
44. The RECOVERY Collaborative Group. Dexamethasone in Hospitalized Patients with Covid-19. *N Engl J Med.* 2021; 384(8):693–704. <https://doi.org/10.1056/NEJMoa2021436> PMID: 32678530
45. Singh AK, Majumdar S, Singh R, Misra A. Role of corticosteroid in the management of COVID-19: A systemic review and a Clinician's perspective. *Diabetes Metab Syndr Clin Res Rev.* 2020; 14(5):971–8. <https://doi.org/10.1016/j.dsx.2020.06.054> PMID: 32610262
46. Soto A. El uso de drogas sin efecto demostrado como estrategia terapéutica en COVID-19 en el Perú. *Acta Médica Peru.* 2020; 37(3):255–7. <https://doi.org/10.35663/amp.2020.373.1548>
